# Supplementary material for: Graphene/carbon-coated Fe3O4 nanoparticle hybrids for enhanced lithium storage
Source: Royal Society of Chemistry journal article supplement (doi:10.1039/c4ta05913a), 2014-12-05
Supplement: c4ta05913a1.pdf [file c4ta05913a1.pdf]

## Supporting Information

### Graphene/Carbon-Coated Fe<sub>3</sub>O<sub>4</sub> Nanoparticles Hybrids for Enhanced Lithium Storage

*Xin Jiang, Xiaoling Yang, Yihua Zhu, \* Yifan Yao, Peng Zhao, and Chunzhong Li\**

Key Laboratory for Ultrafine Materials of Ministry of Education, School of Materials

Science and Engineering, East China University of Science and Technology, 130

Meilong Road, Shanghai 200237, China

\*Corresponding author: Tel.: +86-21-64252022, Fax: +86-21-64250624

E-mail address: yhzhu@ecust.edu.cn (Y. Zhu); czli@ecust.edu.cn (C. Li)

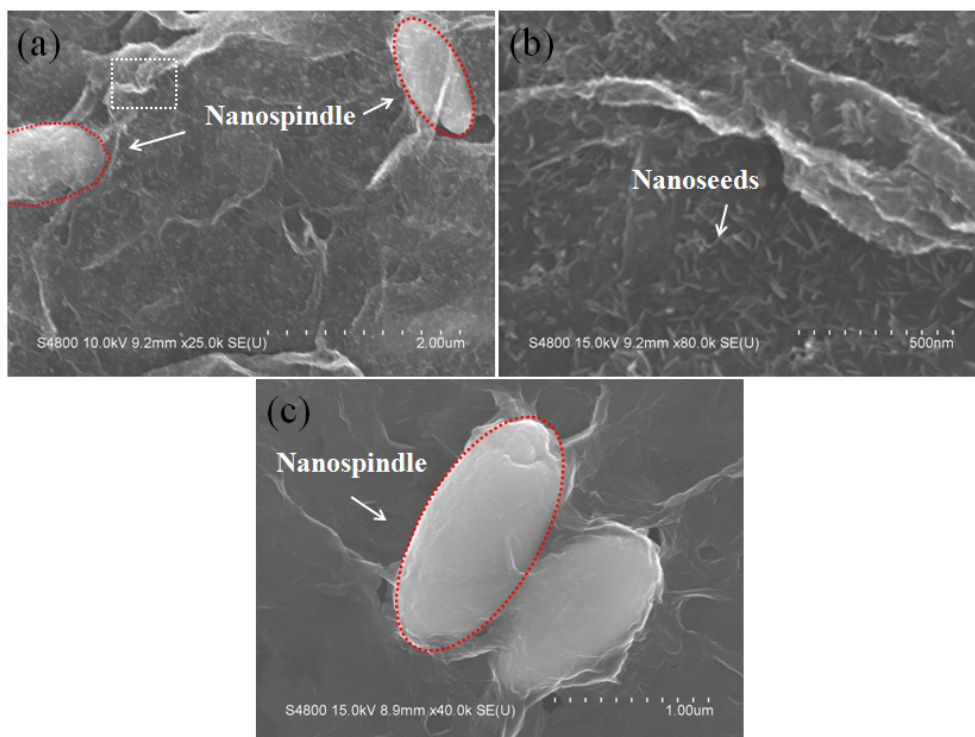

Fig. S1. (a) Low-magnification SEM image of the G/β-FeOOH when mixed solution (part B) wasn't filtered with a PTFE membrane and (b) the corresponding high-magnification SEM image for the square region (dashed line) in (a). (c) SEM image of the G/β-FeOOH when both PTFE membrane and CTAB weren't used.

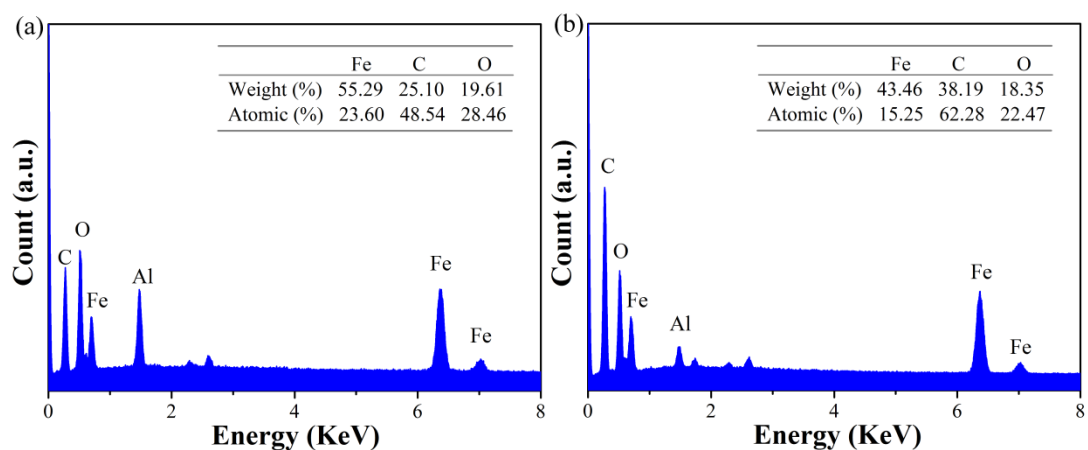

Fig. S2. The EDS spectrum for (a) G/Fe<sub>3</sub>O<sub>4</sub> and (b) G/Fe<sub>3</sub>O<sub>4</sub>@C (1.0/6), in which the Al signal originates from the aluminum foil support for SEM observation.

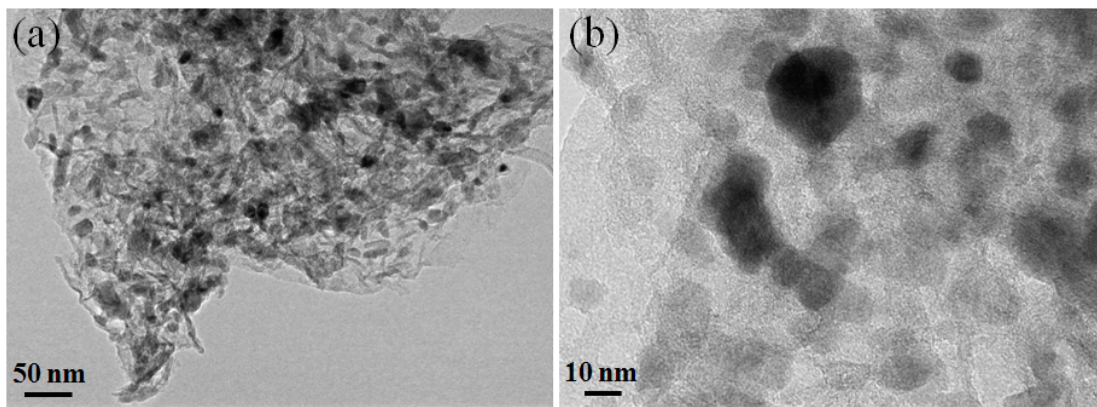

Fig. S3. (a) TEM and (b) HRTEM images of G/Fe<sub>3</sub>O<sub>4</sub>@C (1.0/4).

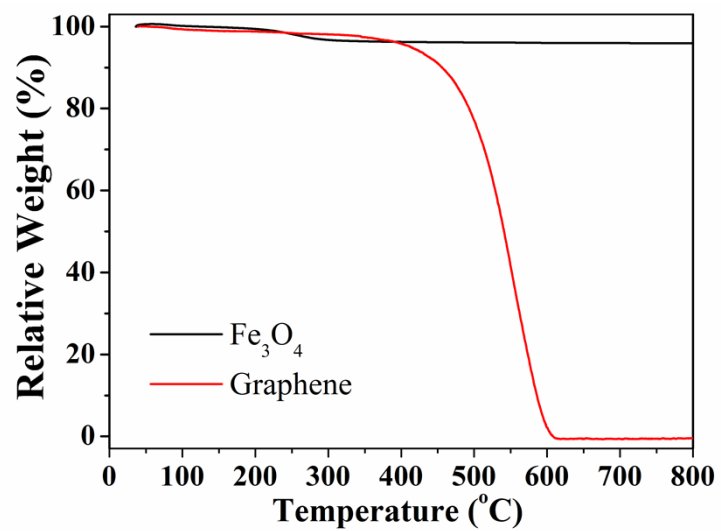

Fig. S4. TG curves of Fe<sub>3</sub>O<sub>4</sub> and graphene.

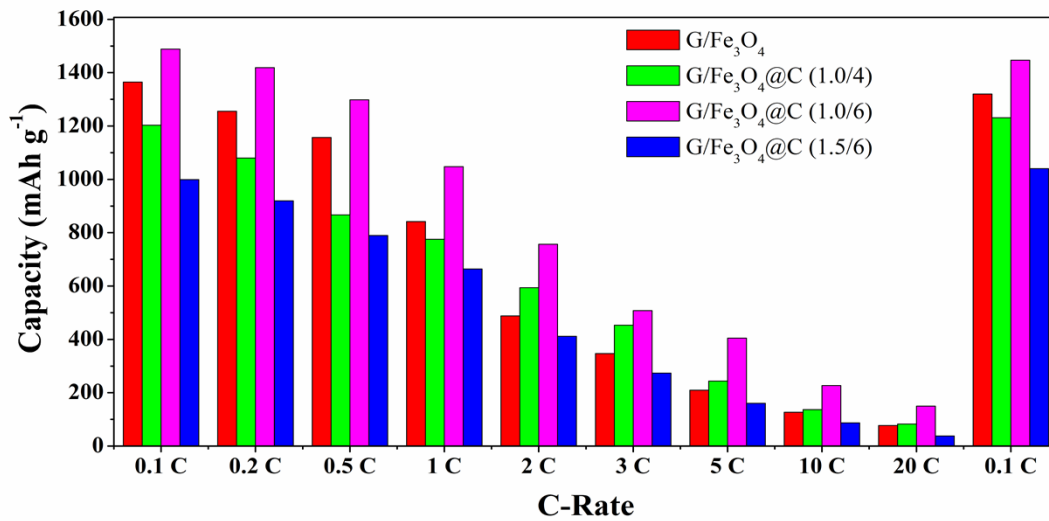

Fi

g. S5. Rate performance comparison of obtained electrodes at various current rates (0.1 C - 20 C).

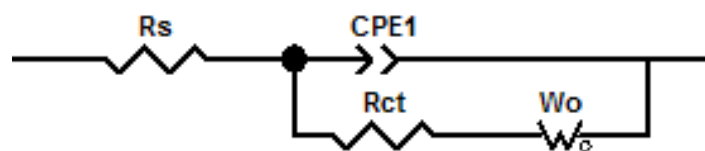

Fig. S6. The equivalent circuit used to fit the EIS.
